# Supplementary material for: Effects of Thymol and Thymol α-D-Glucopyranoside on Intestinal Function and Microbiota of Weaned Pigs
Source: MDPI journal article supplement (doi:10.3390/ani10020329), 2020-02-19
Supplement: s1 [file s1]

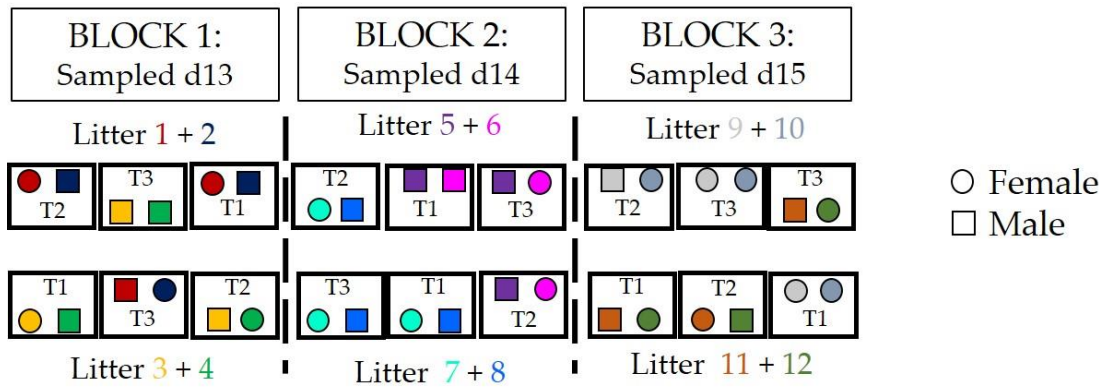

Figure S1: Schematic overview of the allocation

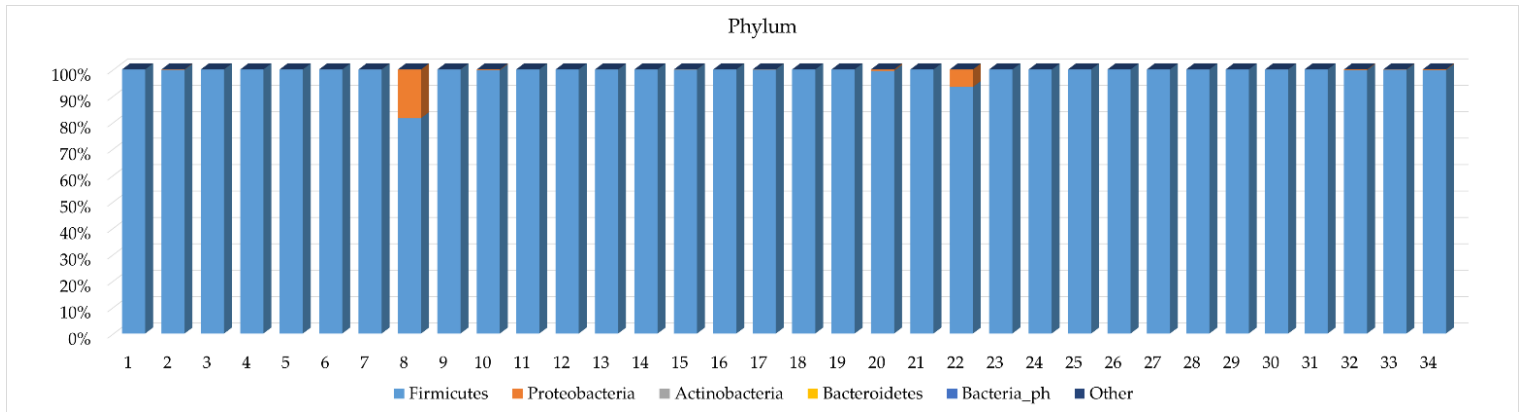

(a)

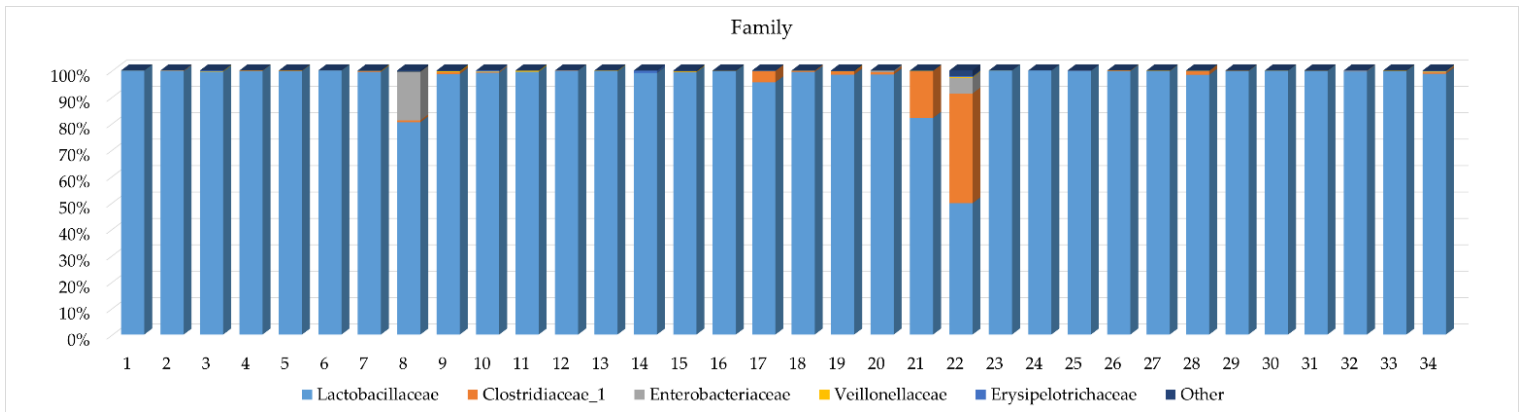

(b)

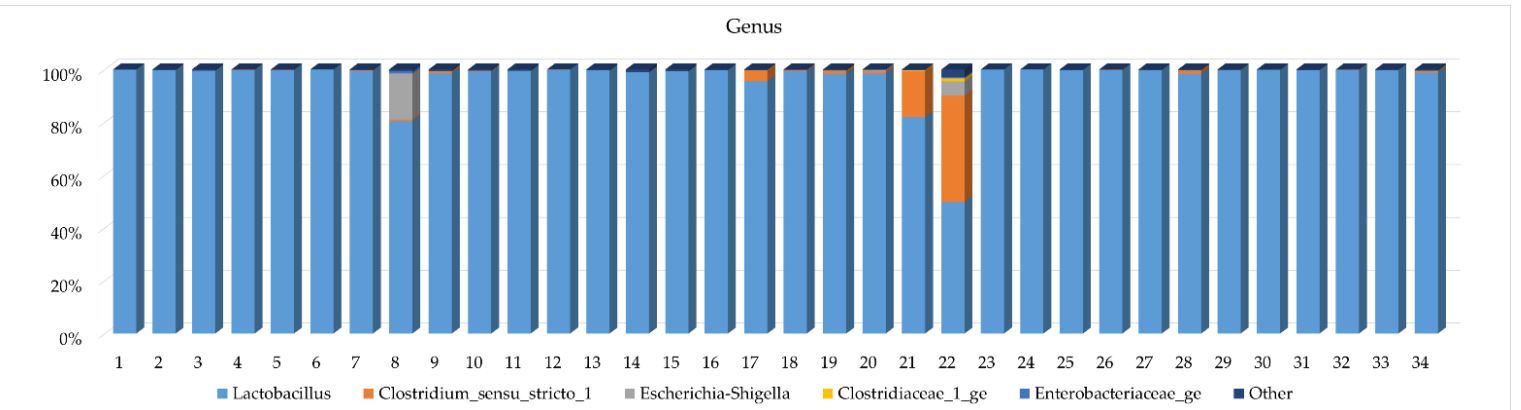

(c)

**Figure S2:** Bacterial community compositions present in digesta of the last 25% of small intestinal length for each individual pig. The cumulated histograms show the relative abundance of the identified taxa at phylum (a), family (b) and genus (c) level.
